# Supplementary material for: B cell–derived IL-27 promotes control of persistent LCMV infection
Source: PubMed Central journal article supplement — Proc Natl Acad Sci U S A. 2022 Jan 12;119(3):e2116741119. doi: 10.1073/pnas.2116741119 (PMC8784116; doi:10.1073/pnas.2116741119), 2022-01-12
Supplement: pnas.2116741119.sapp.pdf [file pnas.2116741119.sapp.pdf]

## **Supplementary Information for**

### **B cell-derived IL-27 promotes control of persistent LCMV infection**

Isaraphorn Pratumchai<sup>1,2</sup>, Jaroslav Zak<sup>1</sup>, Zhe Huang<sup>1</sup>, Booki Min<sup>3</sup>, Michael B. A. Oldstone<sup>1,\*</sup>  
& John R. Teijaro<sup>1,\*</sup>

<sup>1</sup>Department of Immunology and Microbiology, The Scripps Research Institute, La Jolla,  
CA 92037, USA

<sup>2</sup>Department of Immunology, Leiden University Medical Center, Leiden, 2333 ZA, The  
Netherlands

<sup>3</sup>Department of Microbiology-Immunology, Northwestern University Feinberg School of  
Medicine, Chicago, IL 60611, USA

**\*Correspondence to:**

Michael B. A. Oldstone

**Email:** mbaobo@scripps.edu

John R. Teijaro

**Email:** teijaro@scripps.edu

Tel: 858 784 7397

Fax: 858 784 9981

**This PDF includes**

- **Supplementary Methods**
- **Figures S1-S4**
- **SI References**

## **Supplementary Methods**

### **Details of reagents and resources**

| Reagents and resources                                       | Source    | Identifier  |
|--------------------------------------------------------------|-----------|-------------|
| <b>Antibodies</b>                                            |           |             |
| PE/Cyanine7 anti-mouse CD8a Antibody                         | Biolegend | Cat# 100722 |
| PerCP/Cyanine5.5 anti-mouse CD4 Antibody                     | Biolegend | Cat#116012  |
| APC anti-mouse/human CD44 Antibody                           | Biolegend | Cat# 103012 |
| FITC anti-mouse CD279 (PD-1) Antibody                        | Biolegend | Cat# 135214 |
| Brilliant Violet 421™ anti-mouse IFN-γ Antibody              | Biolegend | Cat# 505830 |
| PE anti-mouse TNF-α Antibody                                 | Biolegend | Cat#506306  |
| Alexa Fluor® 647 anti-mouse IL-27 p28 Antibody               | Biolegend | Cat#516904  |
| PE anti-mouse IL-27 p28 Antibody                             | Biolegend | Cat#516908  |
| PE/Cyanine7 anti-mouse IL-27 p28 Antibody                    | Biolegend | Cat#516910  |
| Brilliant Violet 421™ anti-mouse CD138 (Syndecan-1) Antibody | Biolegend | Cat#142508  |
| Brilliant Violet 421™ anti-mouse CD185 (CXCR5) Antibody      | Biolegend | Cat#145512  |

|                                                                                                     |                              |                 |
|-----------------------------------------------------------------------------------------------------|------------------------------|-----------------|
| PE anti-mouse CD185 (CXCR5) Antibody                                                                | Biolegend                    | Cat#145504      |
| Recombinant Mouse IL-6 (carrier-free)                                                               | Biolegend                    | Cat#575702      |
| Purified anti-mouse CD40 Antibody                                                                   | Biolegend                    | Cat#102802      |
| PE-conjugated anti-mouse EB13 Antibody                                                              | R&D Systems                  | Cat#IC18341P    |
| Alexa Fluor® 647 AffiniPure F(ab') <sub>2</sub> Fragment Goat Anti-Human IgG, Fcy fragment specific | Jackson Immuno Research Labs | Cat#109-606-170 |
| BV421 mouse anti-Bcl6 clone K112-91                                                                 | BD                           | Cat#563363      |
| PE Rat Anti-Mouse IL-27ra Clone 2918 (RUO)                                                          | BD                           | Cat#564337      |
| Alexa Fluor® 647 Mouse Anti-Stat1 (pY701)                                                           | BD                           | Cat#612597      |
| PE Mouse Anti-Stat3 (pY705)                                                                         | BD                           | Cat#612569      |
| TotalSeq B0301 Hashtag 1 antibody                                                                   | Biolegend                    | 155831          |
| TotalSeq B0302 Hashtag 2 antibody                                                                   | Biolegend                    | 155833          |
| TotalSeq B0303 Hashtag 3 antibody                                                                   | Biolegend                    | 155835          |
| TotalSeq B0304 Hashtag 4 antibody                                                                   | Biolegend                    | 155837          |
| TotalSeq B0305 Hashtag 5 antibody                                                                   | Biolegend                    | 155839          |
| TotalSeq B0306 Hashtag 6 antibody                                                                   | Biolegend                    | 155841          |
| TotalSeq B0307 Hashtag 7 antibody                                                                   | Biolegend                    | 155843          |
| TotalSeq B0308 Hashtag 8 antibody                                                                   | Biolegend                    | 155845          |
| Chemical, Peptides, and Recombinant Proteins                                                        |                              |                 |
| Protein Transport Inhibitor (Containing Brefeldin A) BD GolgiPlug™                                  | BD                           | Cat#555029      |
| eBioscience™ Cell Stimulation Cocktail (plus protein transport inhibitors) (500X)                   | Thermo Fisher Scientific     | Cat#00-4975-93  |
| eBio Fix/Perm Diluent                                                                               | Thermo                       | Cat#00-5223-56  |

|                                                                         |                                 |                                                                                                                   |
|-------------------------------------------------------------------------|---------------------------------|-------------------------------------------------------------------------------------------------------------------|
|                                                                         | Fisher Scientific               |                                                                                                                   |
| eBioscience™ Fixation/Permeabilization Concentrate                      | Thermo Fisher Scientific        | Cat#00-5123-43                                                                                                    |
| Recombinant Mouse IL-27 (NS0-expressed) Protein                         | R&D Systems                     | Cat# 2799-ML-010                                                                                                  |
| Recombinant Mouse IL-21 R Fc Chimera Protein, CF                        | R&D Systems                     | 596-MR-100                                                                                                        |
| Standard lipopolysaccharide from <i>E. coli</i> K12 strain; TLR4 ligand | Invivogen                       | tlrl-eklps                                                                                                        |
|                                                                         |                                 |                                                                                                                   |
| <b>Experimental Models: Organisms/Strains</b>                           |                                 |                                                                                                                   |
| Mb1-Cre                                                                 | Jackson Laboratory              | Cat#20505                                                                                                         |
| granzyme-B-Cre                                                          | Jackson Laboratory              | Cat#003734                                                                                                        |
| CD4-Cre                                                                 | Jackson Laboratory              | Cat# 022071                                                                                                       |
| STAT1                                                                   | Jackson Laboratory              | Cat# 012606                                                                                                       |
| Stat3 <sup>fl/fl</sup>                                                  | Jackson Laboratory              | Cat#016923                                                                                                        |
| SMARTA                                                                  | Jackson Laboratory              | Cat#030450                                                                                                        |
| Ebi3                                                                    | Jackson Laboratory              | Cat# 008691                                                                                                       |
| XCR1                                                                    | Reiken                          | Cat# RBRC09929                                                                                                    |
| IL-27eGFP                                                               | University of Colorado Anschutz | Ross.Kedl@cuanschutz.edu                                                                                          |
| IL-27ra <sup>flox/flox</sup>                                            | Northwestern University         | booki.min@northwestern.edu                                                                                        |
| IL-27p28 <sup>flox/flox</sup>                                           | UCSD                            | lil034@ucsd.edu                                                                                                   |
| <b>Software and Algorithms</b>                                          |                                 |                                                                                                                   |
| GraphPad Prism 7                                                        | GraphPad Software               | <a href="https://www.graphpad.com/">https://www.graphpad.com/</a>                                                 |
| FlowJo 10.4.2                                                           | Tree Star                       | <a href="https://www.flowjo.com/">https://www.flowjo.com/</a>                                                     |
| Cellranger 4.0.0                                                        | 10X Genomics                    | <a href="https://support.10xgenomics.com/single-cell-gene-">https://support.10xgenomics.com/single-cell-gene-</a> |

|              |            |                                                          |
|--------------|------------|----------------------------------------------------------|
|              |            | expression/software/pipelines/latest/what-is-cell-ranger |
| Seurat 4.0.3 | Satija lab | (1)                                                      |





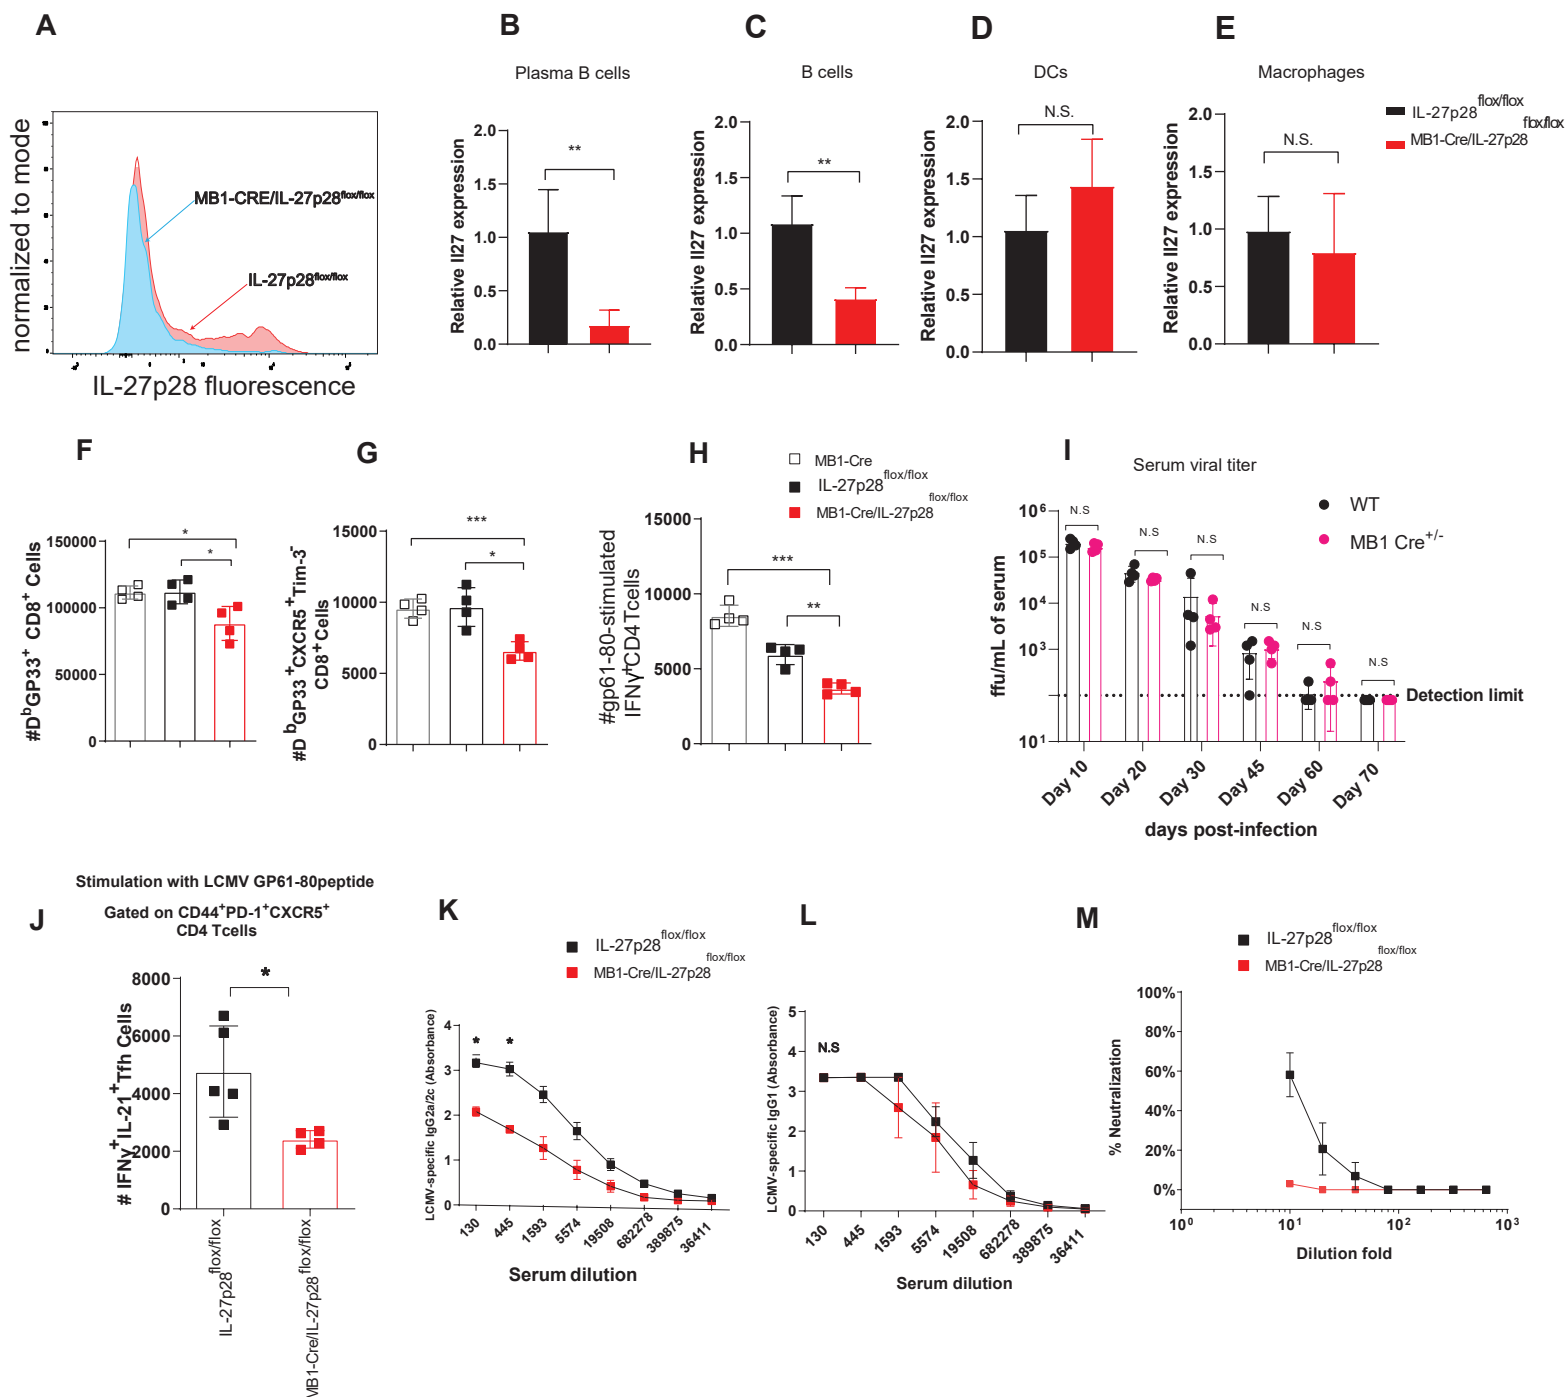

### Figure S2. IL-27p28 expressing B cells are essential for control of persistent LCMV infection

Mice with B cell-specific IL-27p28 deletion were generated by crossing IL-27p28<sup>fl/fl</sup> mice to MB1-cre<sup>+/-</sup> Mice. IL-27p28<sup>fl/fl</sup> and MB1-Cre/IL-27p28<sup>fl/fl</sup> mice were infected with 2x10<sup>6</sup> PFU LCMV CI-13. At day 9 p.i. A) IL-27p28 expression was determined by intracellular FACS staining in MB1-Cre/IL-27p28<sup>fl/fl</sup> and IL-27p28<sup>fl/fl</sup> mice. B-E) Relative Il27 mRNA expression in sorted CD138<sup>+</sup> plasma cells, B cells, DCs, and macrophages from MB1-Cre/IL-27p28<sup>fl/fl</sup> and IL-27p28<sup>fl/fl</sup> mice was determined by qPCR. (F-I) MB1 cre<sup>+/-</sup> mice were infected with 2x10<sup>6</sup> PFU LCMV CI-13 together with IL-27p28<sup>fl/fl</sup> and MB1-cre<sup>+/-</sup> Mice. IL-27p28<sup>fl/fl</sup> and MB1-Cre/IL-27p28<sup>fl/fl</sup> mice. Splenocytes were analyzed by flow cytometry to determine total number of F) H2-Db GP33-41 virus-specific CD8 T cells, G) virus-specific stem-like CXCR5<sup>+</sup>Tim3<sup>+</sup> CD8 T cells, H) IFN- $\gamma$ -producing GP61-80 LCMV-specific CD4 T cells. I) Serum viral loads of MB1 cre<sup>+/-</sup> and WT mice were determined at different time points p.i. J) At day 40 p.i. splenocytes from LCMV CI-13 infected from MB1-Cre/IL-27p28<sup>fl/fl</sup> and IL-27p28<sup>fl/fl</sup> mice were analyzed by flow cytometry to determine the number of IL-21<sup>+</sup>IFN- $\gamma$ <sup>+</sup> Tfh cells after GP61-80 peptide stimulation. At day 130, serum LCMV-specific K) IgG2a/2c and L) IgG1 antibodies were determined by ELISA. M) Level of serum LCMV-neutralizing antibodies at day 70 p.i. was determined by LCMV CI-13 neutralization assay. Data are representative of two to three experimental replicates and error bars represent mean  $\pm$  SD (panel B-I) or mean  $\pm$  SEM (K-M) from 4-5 mice per group. Statistical analyses of experimental groups were performed using Student's two-tailed t test (B-H), two-way ANOVA (K-M) or Mann-Whitney U test (I): not significant (n.s.), p > 0.05; \*, p  $\leq$  0.05; \*\*, p  $\leq$  0.01; \*\*\*, p  $\leq$  0.001.

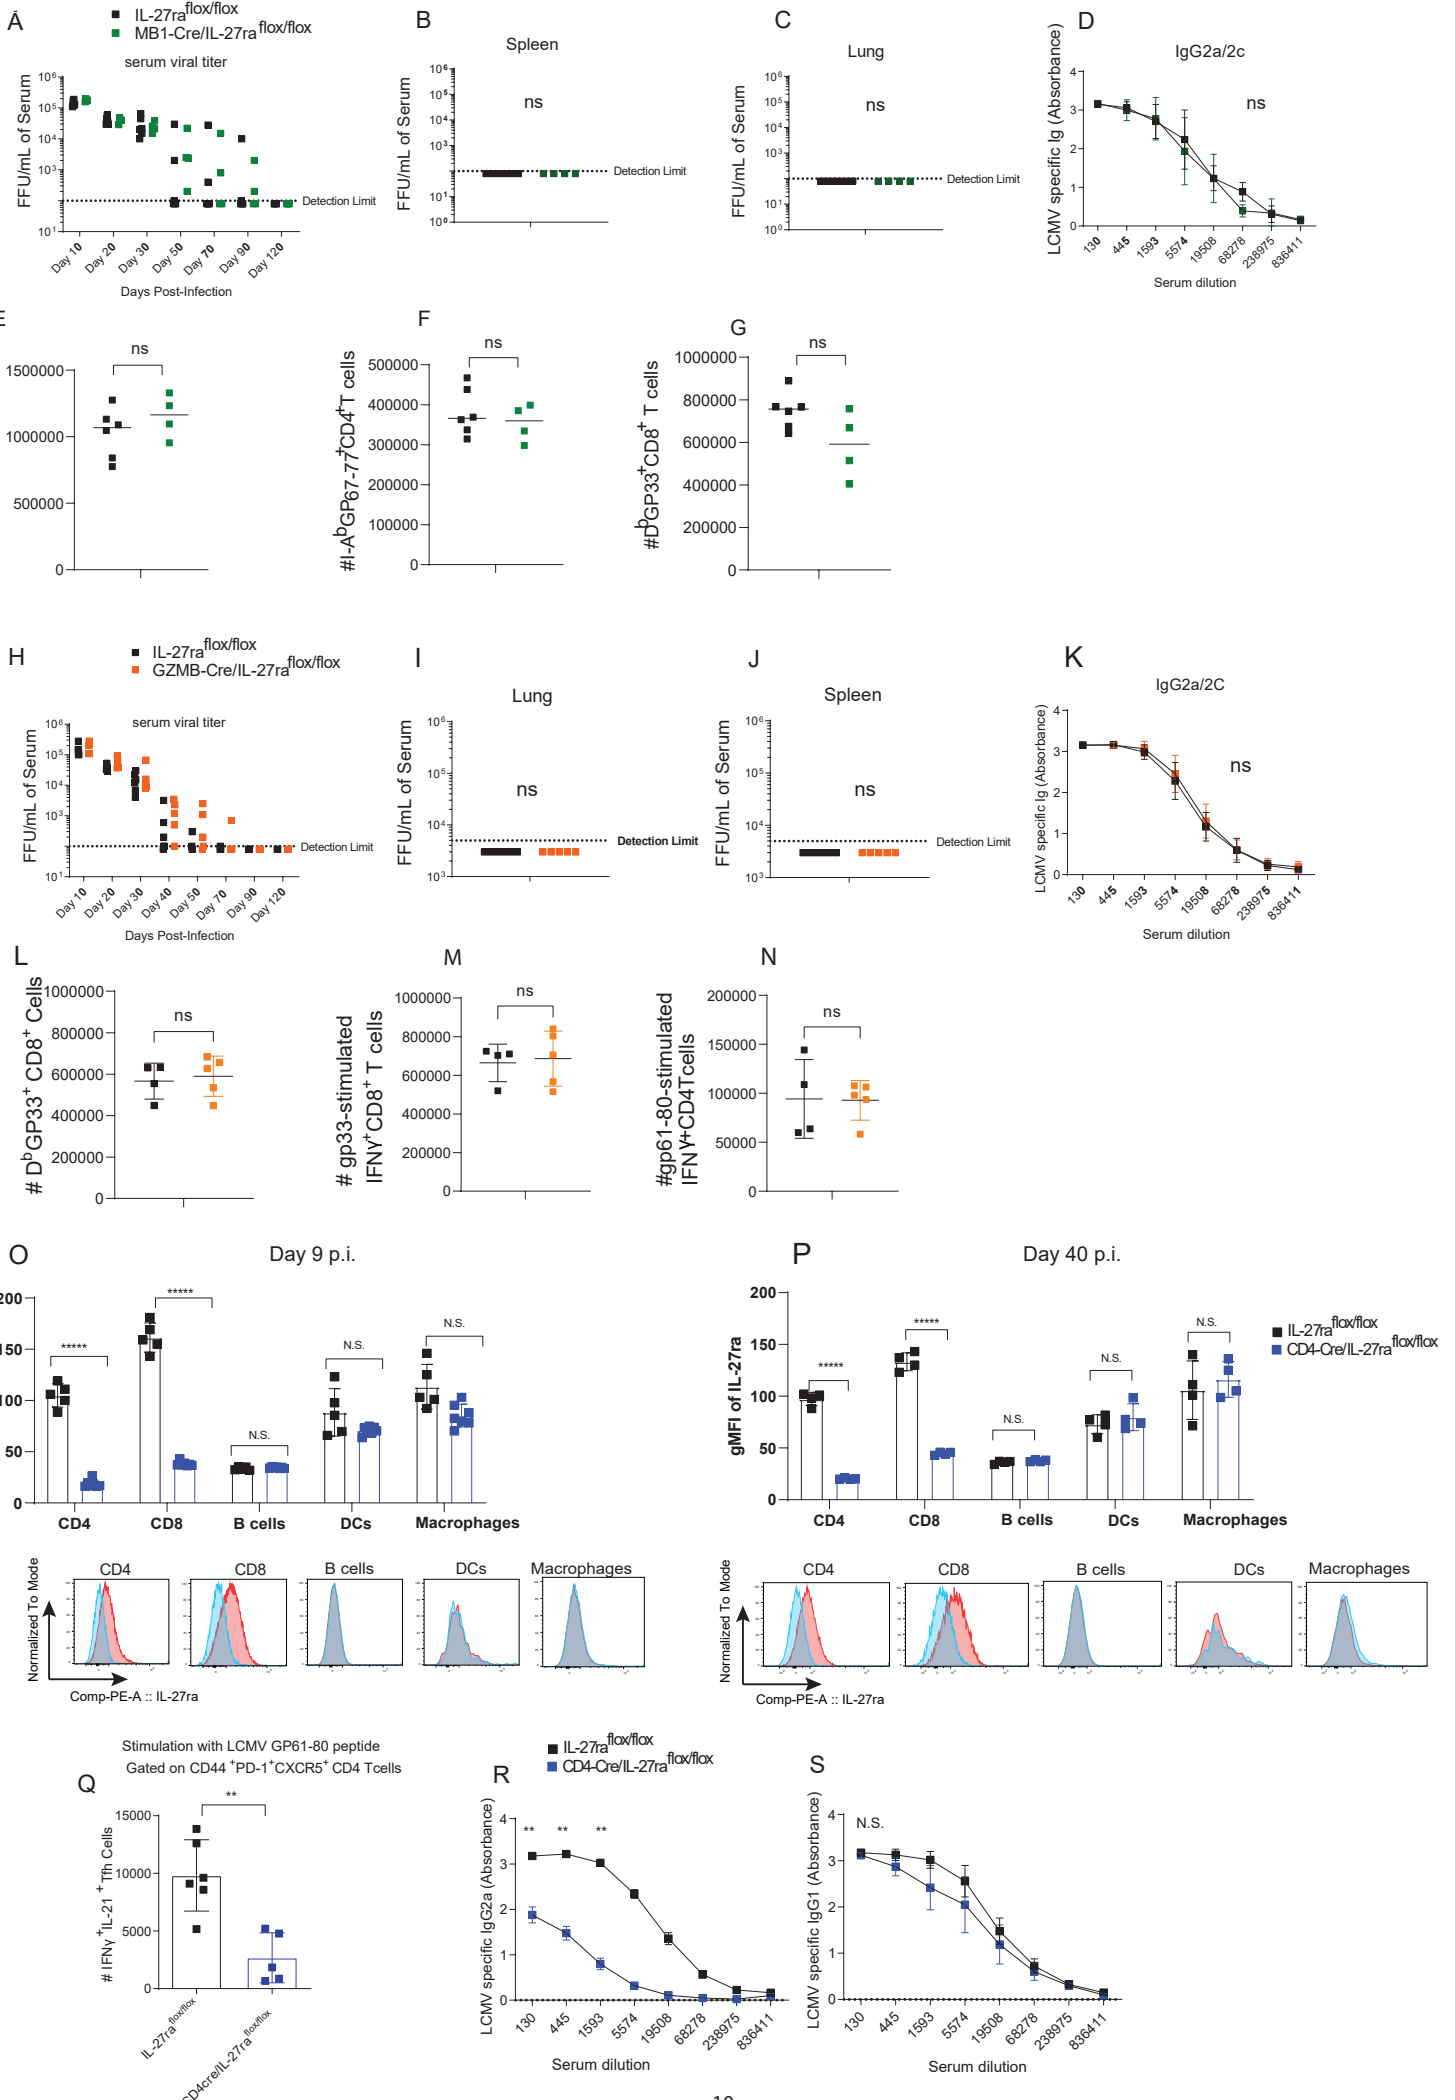

**Figure S3. B cells and Granzyme B+ T cells are not required for control of persistent LCMV infection**

(A-G) IL-27ra<sup>flox/flox</sup> (WT) and MB1-Cre/ IL-27ra<sup>flox/flox</sup> mice (B cell specific IL-27ra KO) were infected with 2x10<sup>6</sup> PFU LCMV CI-13: A) serum viral loads were determined at different time points p.i. At day 120 p.i. viral loads were measured in B) spleen and C) lung. D) LCMV-specific IgG2a/2c antibody was measured in the serum by ELISA. At day 9 p.i., splenocytes were analyzed by flow cytometry to determine numbers of E) germinal center B cells, F) virus-specific CD4 T cells and G) virus GP33-specific CD8 T cells.

(H-N) IL-27ra<sup>flox/flox</sup> (WT) and GZMB-Cre/ IL-27ra<sup>flox/flox</sup> (activated T cell specific IL-27ra KO) were infected with 2x10<sup>6</sup> PFU LCMV CI-13. At day 120 p.i. H) serum viral loads were determined at different time points p.i. At day 120 p.i. viral loads were measured in I) lung and J) spleen. K) LCMV-specific IgG2a/2c antibody was measured in the serum. At day 9 p.i., splenocytes were analyzed by flow cytometry to determine numbers of L) virus-specific CD8 T cells, M) IFN- $\gamma$ -producing GP33-41 LCMV-specific CD8 T cells, and N) IFN- $\gamma$ -producing GP61-80 virus-specific CD4 T cells.

(O-S) IL-27ra<sup>flox/flox</sup> and CD4-Cre/ IL-27ra<sup>flox/flox</sup> were infected with 2x10<sup>6</sup> PFU LCMV CI-13. Splenocytes were stained with IL-27ra antibody and flow cytometry analysis was performed to determine the expression of IL-27ra in CD8 T cells, CD4 T cells, B cells, DCs and macrophages at O) day 9 and P) day 40 p.i. Q) At day 40 p.i. splenocytes were analyzed by flow cytometry to determine the number of IL-21+IFN- $\gamma$ -producing Tfh cells after GP61-80 peptide stimulation. R) At day 120, serum LCMV-specific IgG2a/2c and S) IgG1 antibody were determined by ELISA. Data are representative of two to three experimental replicates and error bars represent mean  $\pm$  SD (panel B-C, E-G, I-J, L-Q) or mean  $\pm$  SEM (D, K,R-S) from 4-5 mice per group. Statistical analyses of experimental groups were performed using Student's two-tailed t test (E-F, L-N), one-way ANOVA (O-P) or Mann-Whitney U test (B-D, I-K): not significant (n.s.), p > 0.05; \*, p  $\leq$  0.05; \*\*, p  $\leq$  0.01; \*\*\*, p  $\leq$  0.001.

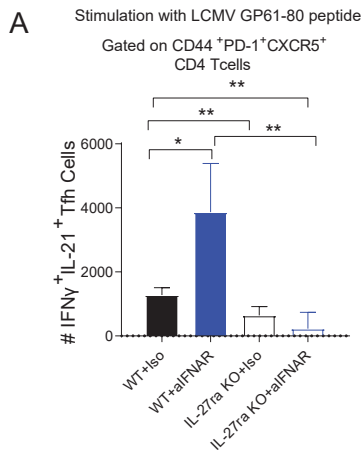

**Figure S4. IL-27R signaling is required for anti-IFNAR immunotherapy to promote IL-21 production by Tfh cells**  
C57BL/6 WT and IL-27ra KO mice were treated with isotype control or anti-IFNAR1 antibody 1 day prior to LCMV-CI13 infection. At day 40 p.i. splenocytes were analyzed by flow cytometry to determine A) the number of IL-21+IFN- $\gamma$ + Tfh cells after GP61-80 peptide stimulation. Data are representative of two to three experimental replicates and error bars represent mean  $\pm$  SD. Statistical analyses of experimental groups were performed using one-way ANOVA and Tukey's post-test: not significant (n.s.),  $P > 0.05$ ; \*,  $P \leq 0.05$ ; \*\*,  $P \leq 0.01$ .

## SI References

1. Y. Hao *et al.*, Integrated analysis of multimodal single-cell data. *Cell* **184**, 3573-3587.e3529 (2021).
